# Supplementary material for: Contribution of Steel Fiber to the Mechanical Property Improvement of C80 Concrete Produced with a High Amount of Artificial Sand Powder
Source: MDPI journal article supplement (doi:10.3390/buildings13030602), 2023-02-24
Supplement: s1 [file s1]

## Supplementary Information

### 1. Significance of parameter symbols

**Table S1 Symbols and Meanings**

| Symbols                                      | Meanings                                                                                                                                                             |
|----------------------------------------------|----------------------------------------------------------------------------------------------------------------------------------------------------------------------|
| $A, B, G, R$                                 | Stochastic variables.                                                                                                                                                |
| $\mu_a, \mu_b, \mu_g, \mu_r$                 | Sample average.                                                                                                                                                      |
| $\sigma_a, \sigma_b, \sigma_g, \sigma_r$     | Standard difference.                                                                                                                                                 |
| $S_a, S_b, S_g, S_r$                         | Sample standard difference.                                                                                                                                          |
| $n_g, n_r$                                   | Sample sequence of $G, R$ .                                                                                                                                          |
| $\mu_{S_a}, \mu_{S_b}, \mu_{S_g}, \mu_{S_r}$ | Sample average of $S_a, S_b, S_g, S_r$ .                                                                                                                             |
| $\delta_g = S_g/\mu_g, \delta_r = S_r/\mu_r$ | Vary coefficient of $G, R$ .                                                                                                                                         |
| $C = \mu_r/\mu_g$                            | Sample averages' ratio of $G, R$ .                                                                                                                                   |
| $k_a, k_b$                                   | Upper $\alpha_a$ and $\alpha_b$ fractile of standard normal distribution for stochastic variables $G$ and $A, R$ and $B$ , respectively.                             |
| $Z_g$ and $Z_a, Z_r$ and $Z_b$               | Stochastic variables of characteristic value with $1 - \alpha_a$ and $1 - \alpha_b$ assurance factor for stochastic variables $G$ and $A, R$ and $B$ , respectively. |
| $Z_c$                                        | Difference between $Z_b$ and $Z_a$                                                                                                                                   |

### 2. Possibility density function of sample standard difference

Suppose  $G \in N(\mu_g, \sigma_g^2)$  and  $R \in N(\mu_r, \sigma_r^2)$ . And  $G \in \{G_1, G_2, \dots, G_{n_g}\}$ ,  $E(g_i) = \mu_g$ ,  $D(g_i) = \sigma_g^2$ ;  $R \in \{R_1, R_2, \dots, R_{n_r}\}$ ,  $E(r_i) = \mu_r$ ,  $D(r_i) = \sigma_r^2$ , respectively. The sample variances are as follows:

$$\begin{cases} S_g^2 = \frac{1}{n_g - 1} \left[ \sum_{i=1}^{n_g} g_i^2 - n_g \mu_g^2 \right] \\ S_r^2 = \frac{1}{n_r - 1} \left[ \sum_{i=1}^{n_r} r_i^2 - n_r \mu_r^2 \right] \end{cases} \quad (1)$$

In which,  $\mu_g = \frac{1}{n_g} \sum_{i=1}^{n_g} g_i$ ,  $\mu_r = \frac{1}{n_r} \sum_{i=1}^{n_r} r_i$ .

From Bure and Parilina [1],  $(n_g - 1)S_g^2 / \sigma_g^2 \sim \chi^2(n_g - 1)$ ,  $\sigma_g > 0$ ,  $S_g > 0$  and  $n_g - 1 > 0$ , there are

$$\begin{cases} F(S) = \int_0^{\frac{(n_g-1)S^2}{\sigma_g^2}} \frac{1}{2^{\frac{n_g-1}{2}} \Gamma(\frac{n_g-1}{2})} y^{\frac{n_g-1}{2}-1} e^{-\frac{y}{2}} dy \\ \Gamma(g) = \int_0^{+\infty} t^{g-1} e^{-t} dt, \quad g \in (0, +\infty) \end{cases} \quad (2)$$

According to Eq. (2), there is the following relationship:

$$f_i(S)\Big|_{(i=g,r)} = \begin{cases} 2\left(\frac{n_i-1}{2}\right)^{\frac{n_i-1}{2}} \frac{S^{n_i-2}}{\sigma_i^{n_i-1} \Gamma(\frac{n_i-1}{2})} e^{-\frac{(n_i-1)S^2}{2\sigma_i^2}}, & S > 0 \\ 0, & S \leq 0 \end{cases} \quad (3)$$

From Eq. (3), let  $\lambda^2 = (n_i - 1)S^2 / (2\sigma_i^2)$ ,  $(i = g, r)$ , then we can get,

$$\begin{cases} \mu_{S_i} = E(S_i) = M_i \sigma_i = 2 \sqrt{\frac{2}{n_i-1}} \frac{\sigma_i}{\Gamma(\frac{n_i-1}{2})} \int_0^\infty \lambda^{n_i-1} e^{-\lambda^2} d\lambda, & (i = g, r) \\ M_i = \sqrt{2} \Gamma(\frac{n_i}{2}) / [\sqrt{n_i-1} \Gamma(\frac{n_i-1}{2})], & (i = g, r) \end{cases} \quad (4)$$

From Eq. (4), there are  $\sigma_i = E(S_i / M_i) = E(S_i) / M_i$ ,  $(i = g, r)$ .

### 3. Possibility density function of difference between two characteristic values

#### 3.1 Dimensionless stochastic vars. $A$ and $B$

Assume that  $\mu_g$  and  $\mu_r$  are known, new stochastic variables are constructed, as follows:

$$A : a_i = g_i / [0.5(\mu_g + \mu_r)], (i = 1, 2, \dots, n_g)$$

$$B : b_i = r_i / [0.5(\mu_g + \mu_r)], (i = 1, 2, \dots, n_r)$$

Then by Eq. (1), there are

$$\begin{cases} \mu_a = \frac{1}{n_g} \sum_{i=1}^{n_g} a_i = \frac{2}{1 + \mu_r / \mu_g} = \frac{2}{1 + C} \\ S_a^2 = \frac{1}{n_g - 1} \sum_{i=1}^{n_g} (a_i - \mu_a)^2 = \frac{4\delta_g^2}{(1 + C)^2} \end{cases} \quad (5)$$

$$\begin{cases} \mu_b = \frac{1}{n_r} \sum_{i=1}^{n_r} b_i = \frac{2}{1 + \mu_g / \mu_r} = \frac{2C}{1 + C} \\ S_b^2 = \frac{1}{n_r - 1} \sum_{i=1}^{n_r} (b_i - \mu_b)^2 = \frac{4C^2 \delta_r^2}{(1 + C)^2} \end{cases} \quad (6)$$

Due to  $A \sim N(\mu_a, \sigma_a^2)$  and  $B \sim N(\mu_b, \sigma_b^2)$  in Bure and Parilina [1], by the same derivation as in Section 2, the possibility density function and average value of sample standard difference for stochastic variables  $A$  and  $B$  are respectively as

$$f_j(S)\Big|_{(j=a,i=g;j=b,i=r)} = \begin{cases} 2\left(\frac{n_j-1}{2}\right)^{\frac{n_j-1}{2}} \frac{S^{n_j-2}}{\sigma_j^{n_j-1} \Gamma(\frac{n_j-1}{2})} e^{-\frac{(n_j-1)S^2}{2\sigma_j^2}}, & S > 0 \\ 0, & S \leq 0 \end{cases} \quad (7)$$

$$\mu_{S_j} = E(S_j) = \int_0^\infty S f_j(S) dS = M_j \sigma_j, (j = a, b) \quad (8)$$

In which  $M_a = M_g$  and  $M_b = M_r$ .

From Eq. (8), the unbiased estimations of  $\sigma_a$  and  $\sigma_b$  are  $S_a / M_a$  and  $S_b / M_b$ , respectively.

#### 3.2 Characteristic value of stochastic variables $G$ , $R$ , $A$ and $B$

Stochastic variables  $G \in N(\mu_g, \sigma_g^2)$  and  $A \sim N(\mu_a, \sigma_a^2)$ , get  $(a - \mu_a) / \sigma_a \sim N(0, 1)$ . There are

$$\alpha_a = \begin{cases} P\{g \leq \mu_g - k_a \sigma_g\} \\ P\{(g - \mu_g)/\sigma_g \leq -k_a\} = P\{a \leq \mu_a - k_a \sigma_a\} \end{cases} \quad (9)$$

Therefore, the upper  $\alpha_a$  fractile  $k_a$  of stochastic variables  $G$  and  $A$  has the same probability  $\alpha_a$ , and the two characteristic values with  $1 - \alpha_a$  assurance factor are respectively as

$$\mu_g - k_a \sigma_g \quad (10-1) \quad \mu_a - k_a \sigma_a \quad (10-2)$$

Similarly, for the stochastic variables  $R$  and  $B$ , there are respectively as

$$\mu_r - k_b \sigma_r \quad (11-1) \quad \mu_b - k_b \sigma_b \quad (11-2)$$

### 3.3 Derivation of possibility density function of characteristic value of stochastic variables $A$ and $B$

Define stochastic variable

$$\bar{a} = \sum_{i=1}^{n_g} a_i / n_g \quad (12)$$

There are

$$\begin{cases} E(\bar{a}) = \frac{1}{n_g} \sum_{i=1}^{n_g} E(a_i) = \frac{1}{n_g} n_g \mu_a = \mu_a \\ D(\bar{a}) = \frac{1}{n_g^2} \sum_{i=1}^{n_g} D(a_i) = \frac{1}{n_g^2} n_g \sigma_a^2 = \frac{\sigma_a^2}{n_g} \end{cases} \quad (13)$$

For Eq. (10-2), the  $\bar{a}$  is used instead of  $\mu_a$ , and  $S_a/M_a$  is used instead of  $\sigma_a$ , getting stochastic variable  $Z_a = \bar{a} - k_a S_a/M_a$ . And there is

$$E(Z_a) = \mu_a - k_a M_a \sigma_a / M_a = \mu_a - k_a \sigma_a$$

Therefore, average value  $E(Z_a)$  of stochastic variable  $Z_a$  is an unbiased estimation of Eq. (10-2).

Due to  $\bar{a} \sim N(\mu_a, \sigma_a^2/n_g)$  in Bure and Parilina [1], the possibility density function of  $\bar{a}$  is

$$f_{\bar{a}}(a) = \frac{1}{\sqrt{2\pi}} \frac{1}{\sigma_a / \sqrt{n_g}} e^{-\frac{(a-\mu_a)^2}{2\sigma_a^2/n_g}}, (-\infty < a < +\infty) \quad (14)$$

Assume that the possibility density function of stochastic variable  $Z_a$  is  $g_{Z_a}(a, S)$ . And since  $\bar{a}$  and  $S_a$  are independent of each other, then  $g_{Z_a}(a, S) = f_{\bar{a}}(a) f_a(S)$ . Let  $u = a - k_a S/M_a$ , then there is

$$F_{Z_a}(z) = \int_{-\infty}^{\infty} [\int_{-\infty}^{z+k_a S/M_a} g_{Z_a}(a, S) da] dS = \int_{-\infty}^z [\int_{-\infty}^{\infty} f_{\bar{a}}(u + k_a S/M_a) f_a(S) dS] du \quad (15)$$

From the above formula, the possibility density function of stochastic variable  $Z_a$  is:

$$\begin{cases} f_{Z_a}(z) = H_a \int_0^{\infty} S^{n_g-2} e^{-\frac{1}{2\sigma_a^2} [n_g(k_a S/M_a + z - \mu_a)^2 + (n_g-1)S^2]} dS \\ H_a = \sqrt{\frac{2n_g}{\pi}} \frac{\left(\frac{n_g-1}{2}\right)^{\frac{n_g-1}{2}}}{\sigma_a^{n_g} \Gamma\left(\frac{n_g-1}{2}\right)} \end{cases} \quad (16)$$

Define stochastic variable

$$\bar{b} = \sum_{i=1}^{n_r} b_i / n_r \quad (17)$$

Same as above, getting stochastic variable  $Z_b = \bar{b} - k_b S_b/M_b$ , its possibility density function is

$$\begin{cases} f_{Z_b}(z) = H_b \int_0^\infty S^{n_r-2} e^{-\frac{1}{2\sigma_b^2}[n_r(k_b S/M_b + z - \mu_b)^2 + (n_r-1)S^2]} dS \\ H_b = \sqrt{\frac{2n_r}{\pi}} \frac{\left(\frac{n_r-1}{2}\right)^{\frac{n_r-1}{2}}}{\sigma_b^{n_r} \Gamma\left(\frac{n_r-1}{2}\right)} \end{cases} \quad (18)$$

### 3.4 Derivation of possibility density distribution of difference between characteristic values of stochastic variables $A$ and $B$

Let  $Z_c = Z_b - Z_a$ . According to the independence of stochastic variables  $Z_a$  and  $Z_b$ , the possibility density function of stochastic variable  $Z_c$  is  $g_{Z_c}(Z_a, Z_b)$ , then

$$F_{Z_c}(z) = \int_{-\infty}^z \left[ \int_{-\infty}^\infty g_{Z_c}(Z_b - u, Z_b) dZ_b \right] du \quad (19)$$

Therefore, the possibility density function of  $Z_c$  is

$$f_{Z_c}(u) = \int_{-\infty}^\infty f_{Z_a}(Z_b - u) f_{Z_b}(Z_b) dZ_b \quad (20)$$

Then, the probability of  $Z_c > Z_\alpha$  ( $Z_\alpha$  is any real number data) is

$$P\{Z_c > Z_\alpha\} = 1 - P\{Z_c \leq Z_\alpha\} = 1 - F_{Z_c}(Z_\alpha) \quad (21)$$

### 3.5 Probability calculation of difference between characteristic values of stochastic vars. $G$ and $R$

Define stochastic variable

$$\bar{g} = \sum_{i=1}^{n_g} g_i / n_g \quad (22)$$

There are

$$\begin{cases} E(\bar{g}) = \mu_g \\ D(\bar{g}) = \frac{\sigma_g^2}{n_g} \end{cases} \quad (23)$$

For Eq. (10-1),  $\bar{g}$  and  $S_g/M_g$  are used instead of  $\mu_g$  and  $\sigma_g$  respectively, thus stochastic variable  $Z_g = \bar{g} - k_a S_g/M_g$  is obtained, and there is

$$E(Z_g) = E(\bar{g}) - \frac{k_a}{M_g} E(S_g) = \mu_g - k_a \sigma_g$$

Therefore, average value  $E(Z_g)$  of stochastic variable  $Z_g$  is unbiased estimation of Eq. (10-1).

Define stochastic variable

$$\bar{r} = \sum_{i=1}^{n_r} r_i / n_r \quad (24)$$

Then, there are

$$\begin{cases} E(\bar{r}) = \frac{1}{n_r} \sum_{i=1}^{n_r} E(r_i) = \frac{1}{n_r} n_r \mu_r = \mu_r \\ D(\bar{r}) = \frac{1}{n_r^2} \sum_{i=1}^{n_r} D(r_i) = \frac{1}{n_r^2} n_r \sigma_r^2 = \frac{\sigma_r^2}{n_r} \end{cases} \quad (25)$$

For Eq. (11-1),  $\bar{r}$  and  $S_r/M_r$  are used instead of  $\mu_r$  and  $\sigma_r$  respectively, thus stochastic variable  $Z_r = \bar{r} - k_b S_r/M_r$  is obtained, then there is

$$E(Z_r) = E(\bar{r}) - \frac{k_b}{M_r} E(S_r) = \mu_r - k_b \sigma_r$$

Therefore, average value  $E(Z_r)$  of stochastic variable  $Z_r$  is unbiased estimation of Eq. (11-1).

According to the definition of stochastic variables  $Z_g$  and  $Z_r$ , there is

$$(Z_r - Z_g) / [0.5(\mu_g + \mu_r)] = \bar{b} - k_b S_b / M_b - \bar{a} + k_a S_a / M_a = Z_b - Z_a$$

Considering Eq. (21), the probability that  $Z_r$  is greater than  $Z_g + 0.5Z_\alpha(\mu_g + \mu_r)$  is

$$P\{Z_r - Z_g > 0.5Z_\alpha(\mu_g + \mu_r)\} = 1 - F_{Z_c}(Z_\alpha) \quad (26)$$

When  $Z_\alpha$  is a positive number and close to 0, it can be considered as

$$P\{Z_r > Z_g\} = P\{Z_b > Z_a\} = 1 - P\{Z_c \leq Z_\alpha\} = 1 - F_{Z_c}(Z_\alpha) \quad (27)$$

#### 4. Verification of validity of formulas by calculation examples

Without loss of generality, in the following example, it is assumed that the sample standard differences of stochastic variables  $G$  and  $R$  are the same. Moreover, the number of samples for stochastic variables  $G$  and  $R$  is  $n_g = n_r = 6$ , respectively. Generally, the characteristic value is with 95% assurance factor for a stochastic variable, so take  $\alpha_a = \alpha_b = 1 - 95\% = 5\%$ . Then, the upper  $\alpha_a$  fractile for stochastic vars.  $G$  and  $A$ , and the upper  $\alpha_b$  fractile for stochastic vars.  $R$  and  $B$  are  $k_a = k_b = 1.645$ , respectively.

##### 4.1 When $Z_g > Z_r$

When  $Z_g > Z_r$ , the selected params and calculated results are shown in Table S2, and the possibility density function  $f_{Z_c}(u)$  of  $Z_c$  is pictured in Figure S1. From the calculation results, the probability, stochastic variable  $Z_r$  of characteristic value of stochastic variable  $R$  is greater than stochastic variable  $Z_g$  of characteristic value of stochastic variable  $G$ , is 0.1079, that is, the characteristic value of stochastic var.  $R$  is smaller than that of stochastic var.  $G$ .

**Table S2**  $Z_g > Z_r$

|                            |                        |                                  |                                  |
|----------------------------|------------------------|----------------------------------|----------------------------------|
| Stochastic variable<br>$G$ | Sample average $\mu_g$ | Sample standard difference $S_g$ | Variation coefficient $\delta_g$ |
|                            | 87.3                   | 9.9                              | 0.1134                           |
| Stochastic variable<br>$R$ | Sample average $\mu_r$ | Sample standard difference $S_r$ | Variation coefficient $\delta_r$ |
|                            | 69.5                   | 9.9                              | 0.1424                           |
| $C$                        | 0.7961                 |                                  |                                  |
| Stochastic variable<br>$A$ | Sample average $\mu_a$ | Sample standard difference $S_a$ |                                  |
|                            | 1.1135                 | 0.1263                           |                                  |
| Stochastic variable<br>$B$ | Sample average $\mu_b$ | Sample standard difference $S_b$ |                                  |
|                            | 0.8865                 | 0.1263                           |                                  |
| $Z_\alpha$                 | 0.001                  | $P\{Z_r > Z_g\}$                 | 0.1079                           |

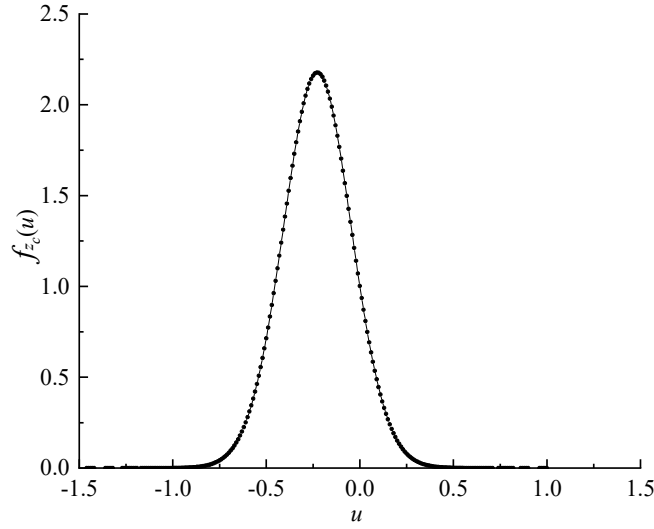

**Figure S1** When  $Z_g > Z_r$ , the possibility density function  $f_{Z_c}(u)$  of  $Z_c$

#### 4.2 When $Z_g = Z_r$

When  $Z_g = Z_r$ , the selected params and calculated results are shown in Table S3, and the possibility density function  $f_{Z_c}(u)$  of  $Z_c$  is pictured in Figure S2. From the calculated results, the probability, stochastic variable  $Z_r$  of characteristic value of stochastic variable  $R$  is greater than stochastic variable  $Z_g$  of characteristic value of stochastic variable  $G$ , is 0.5000, that is, the characteristic value of stochastic variable  $R$  is not greater than that of stochastic variable  $G$ . In addition, from the symmetry of  $f_{Z_c}(u)$  about  $u = 0$  in Figure S2, it can be concluded that if the characteristic value of stochastic var.  $R$  is greater than that of stochastic variable  $G$ , the probability  $P\{Z_r > Z_g\}$  must be greater than 0.5.

**Table S3**  $Z_g = Z_r$

|                            |                        |                                  |                                  |
|----------------------------|------------------------|----------------------------------|----------------------------------|
| Stochastic variable<br>$G$ | Sample average $\mu_g$ | Sample standard difference $S_g$ | Variation coefficient $\delta_g$ |
|                            | 87.3                   | 9.9                              | 0.1134                           |
| Stochastic variable<br>$R$ | Sample average $\mu_r$ | Sample standard difference $S_r$ | Variation coefficient $\delta_r$ |
|                            | 87.3                   | 9.9                              | 0.1134                           |
| $C$                        | 1.0                    |                                  |                                  |
| Stochastic variable<br>$A$ | Sample average $\mu_a$ | Sample standard difference $S_a$ |                                  |
|                            | 1.0                    | 0.1134                           |                                  |
| Stochastic variable<br>$B$ | Sample average $\mu_b$ | Sample standard difference $S_b$ |                                  |
|                            | 1.0                    | 0.1134                           |                                  |
| $Z_\alpha$                 | 0.0000001              | $P\{Z_r > Z_g\}$                 | 0.5000                           |

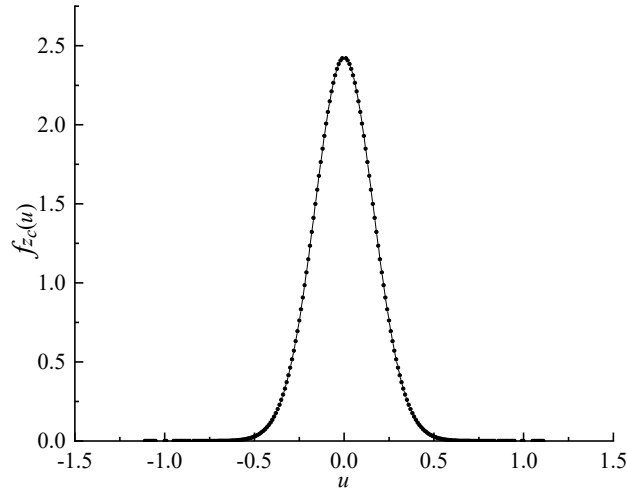

**Figure S2** When  $Z_g = Z_r$ , the possibility density function  $f_{Z_c}(u)$  of  $Z_c$

#### 4.3 When $Z_g < Z_r$

**Table S4**  $Z_g < Z_r$

| Stochastic variable | Sample average $\mu_g$ | Sample standard difference $S_g$ | Variation coefficient $\delta_g$ |
|---------------------|------------------------|----------------------------------|----------------------------------|
| $G$                 | 87.3                   | 9.9                              | 0.1134                           |
| Stochastic variable | Sample average $\mu_r$ | Sample standard difference $S_r$ | Variation coefficient $\delta_r$ |
| $R$                 | 110.4                  | 9.9                              | 0.0897                           |
| $C$                 | 1.2646                 |                                  |                                  |
| Stochastic variable | Sample average $\mu_a$ | Sample standard difference $S_a$ |                                  |
| $A$                 | 0.8832                 | 0.1002                           |                                  |
| Stochastic variable | Sample average $\mu_b$ | Sample standard difference $S_b$ |                                  |
| $B$                 | 1.1168                 | 0.1002                           |                                  |
| $Z_\alpha$          | 0.001                  | $P\{Z_r > Z_g\}$                 | 0.9438                           |

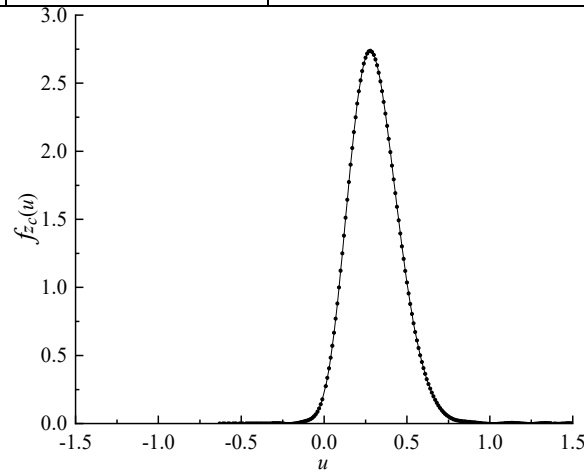

**Figure S3** When  $Z_g < Z_r$ , the possibility density function  $f_{Z_c}(u)$  of  $Z_c$

When  $Z_g < Z_r$ , the selected params and calculated results are shown in Table S4, and the possibility density function  $f_{Z_c}(u)$  of  $Z_c$  is pictured in Figure S3. From the calculated results, the probability, stochastic variable  $Z_r$  of characteristic value of stochastic variable  $R$  is greater than stochastic variable  $Z_g$  of

characteristic value of stochastic variable  $R$ , is 0.9438, that is, the characteristic value of stochastic var.  $R$  is greater than that of stochastic var.  $G$ .

## 5. Results

From above-mentioned calculation examples, it can be concluded as follows: 1) when the probability that stochastic variable  $Z_r$  of characteristic value of stochastic variable  $R$  is greater than stochastic variable  $Z_g$  of characteristic value of stochastic variable  $G$ , is smaller than 0.5, the characteristic value of stochastic variable  $R$  is smaller than that of stochastic variable  $G$ ; when the probability is equal to 0.5, the characteristic value of stochastic variable  $R$  is equal to that of stochastic variable  $G$ ; when the probability is greater than 0.5, the characteristic value of stochastic variable  $R$  is greater than that of stochastic variable  $G$ .

The theoretical formula of statistics developed above is complicated, the calculation is mainly based on integral, and the amount of calculation is large. Since formulas (16) and (18) have no analytical solutions, Mathematica 12.0 scientific calculation software was adopted, and in this software the numerical calculation of theoretical formulas was completed through programming. In the program,  $f_{Z_a}(z)$  in formula (16) and  $f_{Z_b}(z)$  in formula (18) were obtained by 20 polynomials (i.e.,  $1, z, z^2 \dots z^{19}$ ) fitting, respectively, but which made the subsequent integral calculation amount large. On an ordinary Win10 system computer, about 40 minutes were taken for the calculation of a complete theoretical formula at one time. In order to facilitate the application of theoretical formula in this study,  $\mu_g, \mu_r, \sigma_g, \sigma_r, n_g, n_r, k_a$  and  $k_b$  can be taken as the unknown params to regress and fit the calculation formula of  $f_{Z_c}(u)$  in formula (20) in the future.

## References

- [1] Bure V, Parilina E. Probability Theory and Mathematical Statistics. World Scientific, 2013.
